# Supplementary material for: Aggregation-Inhibiting scFv-Based Therapies Protect Mice against AAV1/2-Induced A53T-α-Synuclein Overexpression
Source: MDPI journal article supplement (doi:10.3390/biom13081203), 2023-07-31
Supplement: s1 [file s1]

## Supporting Information

### **Aggregation-inhibiting scFv-based therapies protect mice against AAV1/2-induced A53T- $\alpha$ -synuclein overexpression**

*Benjamin W. Schlichtmann<sup>1,5</sup>, Bharathi N Palanisamy<sup>2</sup>, Emir Malovic<sup>2</sup>, Susheel K. Nethi<sup>1,5</sup>, Piyush Padhi<sup>2</sup>, Monica Hepker<sup>2</sup>, Joseph Wurtz<sup>2</sup>, Manohar John<sup>4,5</sup>, Bhupal Ban<sup>6</sup>, Vellareddy Anantharam<sup>2,3,5</sup>, Anumantha G. Kanthasamy<sup>2,3,5</sup>, Surya Mallapragada<sup>1,5,\*</sup>, and Balaji Narasimhan<sup>1,5,\*</sup>*

#### **Supplementary Data**

##### **RNA Isolation and cDNA Synthesis**

Total RNA was isolated from cryopreserved hybridomas using a one-step RNeasy Kit (Qiagen; CatLog: Cat No./ID: 74104, Germantown, MD, USA). In brief, cells were spun down in a tabletop centrifuge at 2000 rpm for 5 min and the supernatant removed. Cell pellet was washed with 1 mL cold PBS. A 250 mL aliquot of this cell suspension, representing  $1-3 \times 10^6$  cells were used for RNA extraction according to the manufacturer's instructions. The corresponding cDNA clones were synthesized using SuperScript™ III First-Strand Synthesis system for reverse transcription (RT)-PCR (Invitrogen CatLog: 8080051) according to the manufacture's protocol using oligo (dT) and hexamer primers.

##### **PCR Amplification of Variable Region of VH and VL Genes**

The variable region sequences of HC and LC genes were amplified using cDNA clones derived from mouse hybridoma using the listed primers.<sup>[60]</sup> In brief, the VH and VL sense and antisense primers were used in 15:4 and 13:3 ratio, respectively. PCR reactions were performed in a volume

of 50 µl with 2 µl cDNA utilizing premixed Invitrogen PCR kits. The PCR reactions were carried out for 30 cycles, utilizing an annealing temperature (Tm) of 58 ±2 °C. The size of PCR products was verified by agarose gel electrophoresis.

**Construction of Plasmids for Periplasmic Expression of Antibodies**

The mouse antibody genes were synthesized, and then sub-cloned to an IPTG-inducible pET-based vector (pAB- cMyc-His tag) using *Bss**HIII* and *Nhe**I* restriction enzymes in such a way to append, in translational frame, Carboxy-terminal tags: a cMyc tag for detection; and a 6xHis-tag for purification via metal (nickel) affinity chromatography. The plasmid vector includes a PelB leader sequence under the control of a T7 promoter for expression in the periplasm of the *E. coli* expression host strain. The equivalent plasmid clone was designated as the mouse gene scFv 3A8. The DNA sequences of the plasmid was confirmed by sequencing.

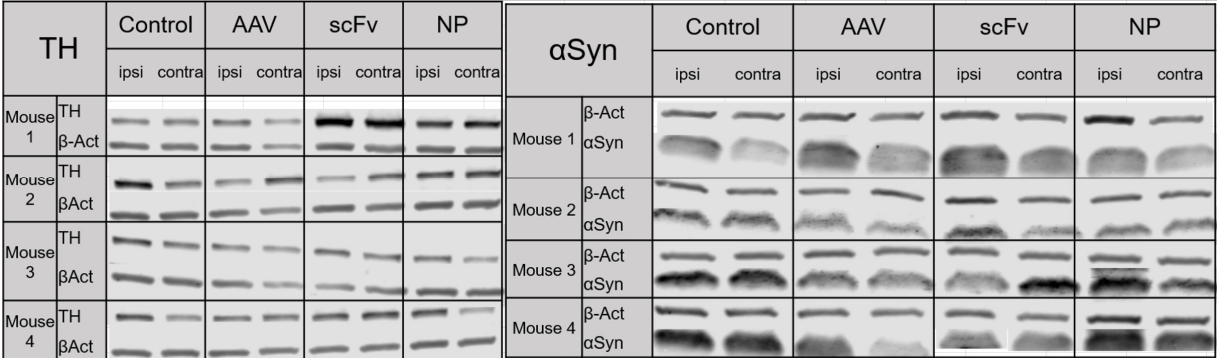

**Supplementary Figure S1.** Western blot images taken of the ipsilateral (ipsi) and contralateral (contra) SN in mice 12 weeks post AAV injection and compared to PBS-injected control. Images were used for densitometric analysis in ImageJ.

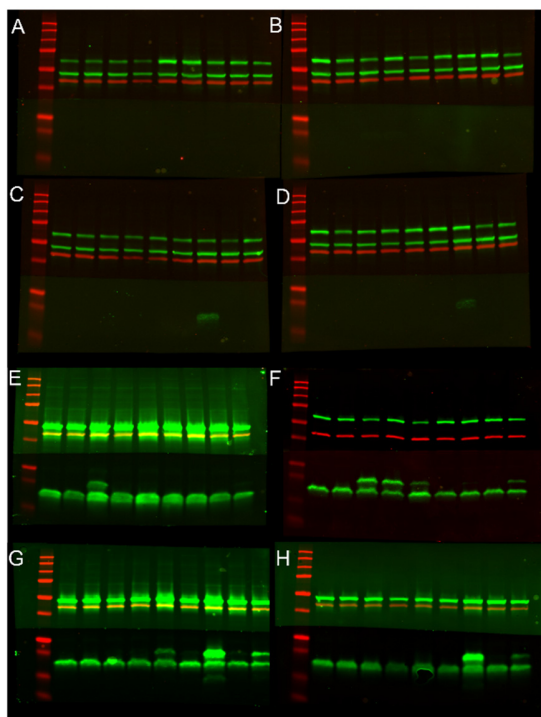

**Supplementary Figure S2.** Western blot original membranes. A-D) lower green band: TH. Red band: B-actin. E-H) lower green band: aSyn. Red band: B-actin. Green and red bands separated by color to remove interference; channels combined here for simplicity. Where applicable, double bands represented by aSyn were incorporated in Imagej integrated density calculations. Column descriptors: column 1 – ladder. A-H) column 2, 3 – control ipsi, contra. B-D, F-H) column 4,5 – AAV ipsi, contra; column 6,7 scFv ipsi, contra; column 8,9 NP ipsi, contra. A) column 4,5 – AAV ipsi, contra; column 6,7 NP ipsi, contra; column 8,9 scFv ipsi, contra. E) column 4,5 – NP ipsi, contra; column 6,7 AAV ipsi, contra; column 8,9 scFv ipsi, contra.

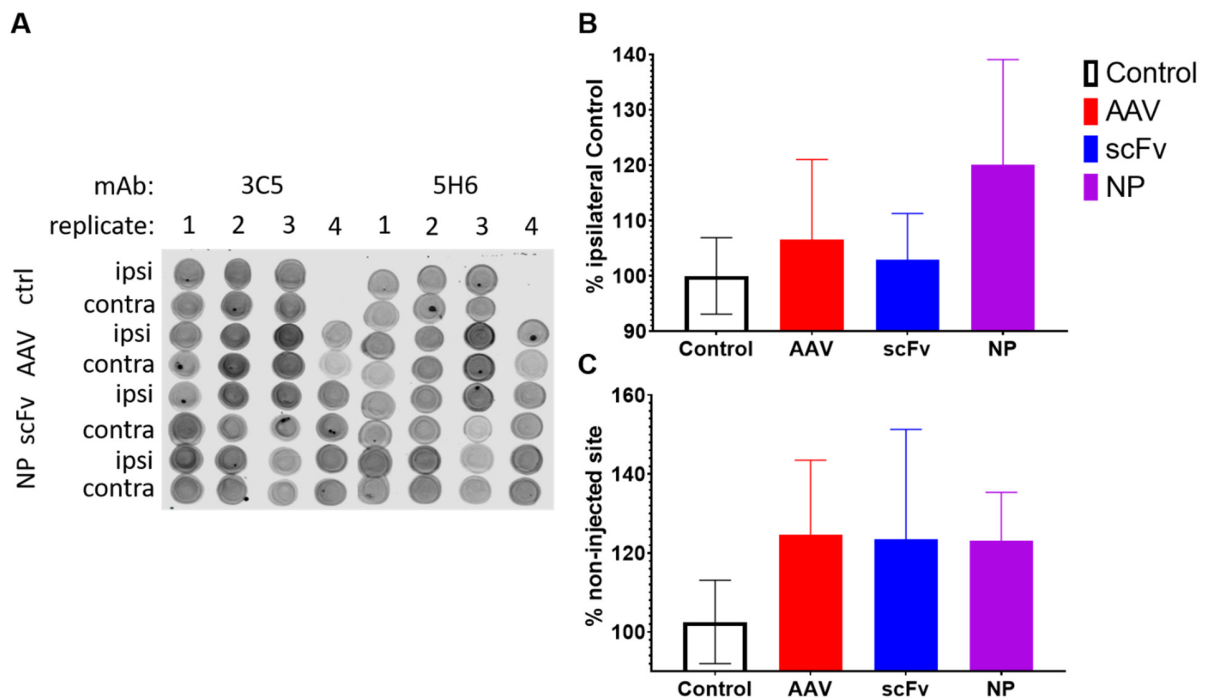

**Supplementary Figure S3.** A) Densitometric analysis of relative  $\alpha$ Syn expression levels in the SN expressed as % ipsilateral/contralateral control B) densitometric analysis of relative TH expression levels in the SN expressed as % ipsilateral/contralateral control C) DA concentration in ng/mg in the STR, evaluated by HPLC, expressed as % ipsilateral/contralateral control D) DOPAC concentration in ng/mg in the STR, evaluated by HPLC, expressed as % ipsilateral/contralateral control. E) Representative dot blot images of samples taken from SN and evaluated for  $\alpha$ Syn<sub>agg</sub> expression by dot immunoblotting. Dot immunoblot of  $\alpha$ Syn<sub>agg</sub> corroborates increased  $\alpha$ Syn expression as determined by western blot analysis. F) densitometric analysis showing % ipsilateral/contralateral control values of  $\alpha$ Syn<sub>agg</sub> for control, AAV, scFv and NP, respectively. n=3 mice for control, n=4 mice for AAV, scFv, and NP.
